# Supplementary material
Source: bioRxiv or medRxiv preprint supplement (https://medrxiv.org/highwire/filestream/91256/field_highwire_adjunct_files/1/2020.07.25.20146431-2.pdf)
Supplement: Supplementary file [file 2020.07.25.20146431-2.pdf]

*Supplementary Method: GeneTrails® Comprehensive Solid Tumor Panel.*

The test is performed on DNA and RNA extracted from macro-dissected, tumor-rich regions of formalin-fixed/paraffin-embedded tissue. The DNA and RNA (cDNA) NGS library preparations are both based on custom QiaSeq chemistry (Qiagen) that includes unique molecular indices for the assessment of library complexity. Sequencing is performed on Illumina NextSeq500/550 instruments and the data are analyzed through custom bioinformatics pipelines. The DNA library is generated by 9,229 custom-designed primer extension assays covering 613,343 base pairs across 124 cancer-related genes. This panel is routinely sequenced to an average read depth of >2,000, providing high sensitivity for SNVs, in/dels and copy number alterations. Variants are identified using both FreeBayes and MuTect2 algorithms in a custom sequencing analysis pipeline. Included in the panel are 227 short repeats that are used to assess microsatellite instability. TMB is estimated by determining the number of likely somatic mutations and normalizing this to mutations per megabase of sequence.

DNA Sequencing Panel: AKT1, AKT2, AKT3, ALK, APC, AR, ARAF, ARID1A, ATM, ATR, BAP1, BARD1, BRAF, BRCA1, BRCA2, BRIP1, CASP8, CCND1, CCNE1, CHEK1, CD274, CDK12, CDKN1B, CDKN2A, CHEK2, CTNNA1, DDR2, DDX11, EGFR, ERBB2, ERBB3, ERBB4, ERCC2, FANCM, ERCC5, ESR1, FAM175A, FANCA, FANCC, FANCD2, FANCE, FANCF, FANCG, FGF3, FGF4, FGF18, FGF19, FGFR1, FGFR2, FGFR3, FGFR4, GNA11, GNAQ, GNAS, HIST1H3B, HRAS, IDH1, IDH2, IDO1, IDO2, INPP4B, NBN, JAK2, KDR, KIT, KRAS, MAP2K1, MAP2K2, MAP2K4, MAPK1, MDC1, MDM2, MDM4, MET, MLH1, MLH3, MRE11, MSH2, MSH6, MTOR, MUTYH, MYC, NF1, NRAS, NTRK1, NTRK2, NTRK3, PALB2, PDCD1LG2, PDGFRA, PIK3CA, PI3CB, PIK3R1, PMS1, PMS2, PLE, PPP2R1A, PPP6C, PTCH1, PTEN, RAC1, RAD50, RAD51, RAD51B, RAD51C, RAD51D, RAD52, RAD54L, RAF1, RASA1, RB1, RET, PICTOR, RIT1, ROS1, RPTOR, STAG2, STAT3, STK11, TOP1, TP53, TSC1, TSC2, XRCC1

*Supplementary Method: Multiplex Immunohistochemistry, Image Acquisition and Processing*

Multiplex IHC was performed on 5 µm FFPE sections using an adapted protocol based on methodology described previously [25, 26]. Briefly, slides were deparaffinized and stained with hematoxylin (S3301, Dako), followed by whole-slide scanning at 20X magnification on an Aperio AT2 (Leica Biosystems). Tissues then underwent 15 minutes of heat-mediated antigen retrieval in pH 6.0 Citra solution (BioGenex), 10 minutes of blocking in Dako Dual Endogenous Enzyme Block (S2003, Dako), then 10 minutes of protein blocking with 5% normal goat serum and 2.5% BSA in TBST. Primary antibody details, dilution, and incubation times are listed in **Suppl. Table 1**. After washing off unbound primary antibody in TBST, either anti-rat, anti-mouse, or anti-rabbit Histofine Simple Stain MAX PO horseradish peroxidase (HRP)-conjugated polymer (Nichirei Biosciences) was applied for 30 minutes at room temperature, followed by AEC chromogen (Vector Laboratories). Slides were digitally scanned following each chromogen development. Scanned images were registered in MATLAB version R2018b using the SURF algorithm in the Computer Vision Toolbox (The MathWorks, Inc). Image processing and cell quantification were performed using FIJI (FIJI Is Just ImageJ) [27], CellProfiler Version 3.5.1 [28], and FCS Express 6 Image Cytometry RUO (De Novo Software). AEC signal was extracted for quantification and

visualization in FIJI using a custom macro for color deconvolution. Briefly, the FIJI plugin Color\_Deconvolution [H AEC] was used to separate hematoxylin, followed by postprocessing steps for signal cleaning and background elimination. AEC signal was extracted in FIJI using the NIH plugin RGB\_to\_CMYK. Color de-convoluted images were processed in CellProfiler to quantify single cell mean intensity signal measurements for each stained marker. Cells were classified based on hierarchical gating (image cytometry) and defined as described in **Fig. 2**. For visualization, signal-extracted images were overlaid in pseudo-color in FIJI.

#### *Supplementary Method: Cyclic-Immunofluorescence*

Cyclic-Immunofluorescence (Cyc-IF) allows the detection of more than 40 proteins on a single FFPE slide. Multiple sequential rounds of immunofluorescence staining and quenching were performed on each patient sample as previously described [30-32]. A control tissue microarray (TMA) composed of normal and cancer tissue samples as well as endometrium, spleen, breast, colorectal, ovary, and fallopian tube cancer cell lines was incorporated into each step of the experiment for quality control and data scaling. This TMA includes a positive and negative control for each antibody incorporated in the assay. The samples were processed as follow: FFPE slides were baked overnight at 55°C followed by 30 minutes at 65°C, before deparaffination. Antigen retrieval was performed using a Cuisinart pressure cooker (model CPC-600). Briefly, slides were emerged in a coplin jar filled with pH6 Citrate buffer. The pressure cooker was set on high for 4 minutes, and slides were incubated in the pressure cooker for 20 minutes before releasing the pressure. Slides were then rinsed once into warm deionized water and incubated for 15 minutes in warm pH9 Tris/EDTA antigen retrieval buffer. After blocking the slides for 30 minutes at room temperature in a solution of PBS containing 10% NGS and 1% BSA, coverslips were mounted using slowfade Gold DAPI mounting media and slides were scanned at 10X magnification using the Axioscan fluorescence slide scanner (Zeiss). Autofluorescence of each tissue was acquired. After imaging, the coverslips were removed by soaking the slides in a vertical position within a staining dish filled with PBS. Slides were then incubated with the first round of four antibodies (**Suppl. Table 3**), directly labeled with different Alexa-Fluor (AF) molecules (AF488, AF555, AF647 and AF750) for 2 hours at room temperature. After acquiring an image of the staining, the fluorescence molecules were quenched using a solution of 3% peroxide and 20 mM NaOH in PBS. Subsequent rounds of staining and quenching were then performed on each slide until all antibodies were probed.

#### *Supplementary Method: Image processing and analysis for Cyclic-Immunofluorescence*

Each image acquired during the Cyc-IF assay was registered based on DAPI features acquired from each round of staining, using custom Matlab scripts (version 2018b) [33]. Segmentation of cells and single-cell feature extraction was then performed using QI Software (Quantitative Imaging Systems). Extracted features included nucleus size and mean intensity for each marker and autofluorescence in each wavelength used for the staining process. Nucleus size and autofluorescence in the AF555 channel were used to filter out cells that appeared to be outliers, and only cells expressing epithelial markers (cancer cells) were selected for downstream analysis. To subtract autofluorescence background, all autofluorescence and protein mean intensities were divided by their respective exposure time. Autofluorescence values from each cell were then subtracted from each protein value, based on their respective wavelength. To normalize and scale the data, all background subtracted data from the samples and the control TMA were incorporated

into a single table, and values were z-scored using median and standard deviation across all markers for each individual cell and across cells for each marker. Heat maps were then constructed using unsupervised hierarchical clustering and K-means clustering of the protein and cells from each sample using custom Python scripts.
